# Supplementary material
Source: PubMed Central journal article supplement (PMC123194)

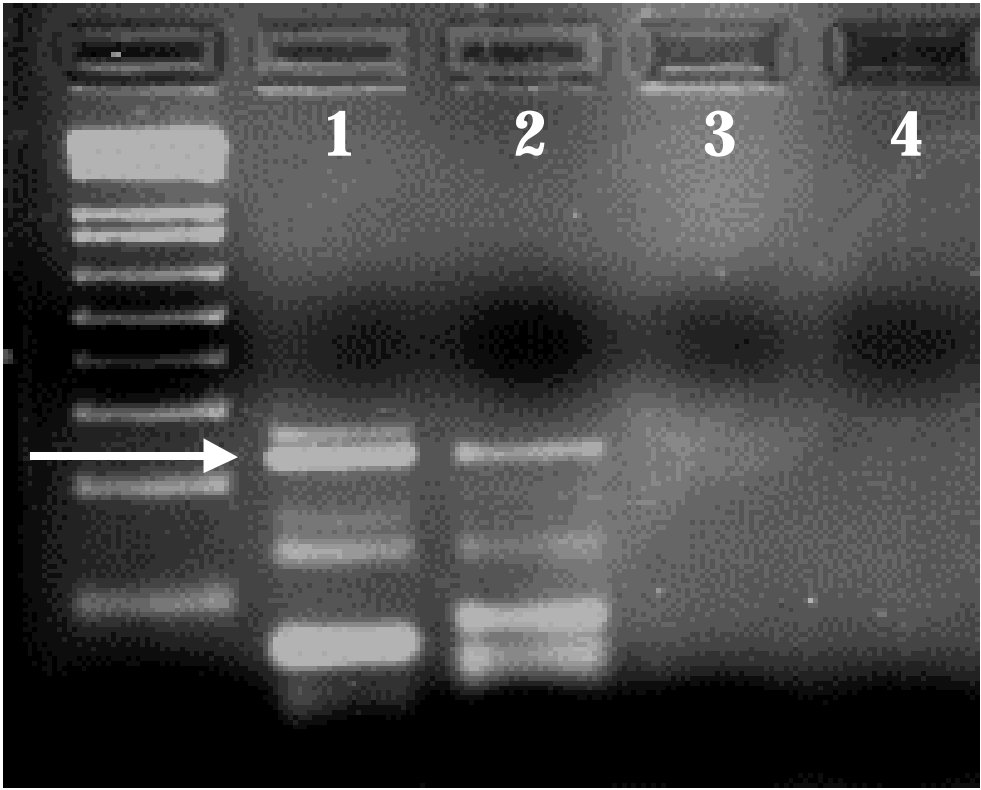

Supplement: pnas_172221699_3.pdf [file pnas_172221699_3.pdf]
